# MIND TO MIND

*Creative writing that explores the abstract side  
of our profession and our lives*

Carol Wiley Cassella, M.D., Editor

## Besse

Andrea R. Williams, M.D.

H Her nameplate ajar on the maple tree  
Lone tire tracks fade into the snow  
Up the long drive  
To the empty house  
On top of the knoll  
For Sale sign at the road

It has been 2 years now

She is a spitfire  
A spunky 92 year-old beauty  
Becomes frail, weak  
Colonoscopy is done  
Large ulcerating mass

Daughter sheds a quiet tear  
She takes her daughter's hand  
Smiles-full of memories and love  
"Let's go home now, dear."  
"Let's go home."

---

From the Alice Peck Day Memorial Hospital, Lebanon, New Hampshire. cegoss@vmialumni.org

Accepted for publication April 15, 2015.

Copyright © 2015, the American Society of Anesthesiologists, Inc. Wolters Kluwer Health, Inc. All Rights Reserved. Anesthesiology 2015; 123:714
